# Supplementary material for: Effectiveness of Exercise, Cognitive Behavioral Therapy, and Pharmacotherapy on Improving Sleep in Adults with Chronic Insomnia: A Systematic Review and Network Meta-Analysis of Randomized Controlled Trials
Source: MDPI journal article supplement (doi:10.3390/healthcare11152207), 2023-08-04
Supplement: s1 [file s1]

# **Effectiveness of Exercise, Cognitive Behavioral Therapy, and Pharmacotherapy on Improving Sleep in Adults with Chronic Insomnia: A Systematic Review and Network Meta-analysis of Randomized Controlled Trials**

## **Supplementary Materials**

**Figure S1.** PRISMA flow chart

**Figure S2.** Risk of bias contributions

**Figure S3.** Indirectness contributions

**Table S1.** Characteristics of interventions in the included studies

**Table S2.** Risk of bias for all studies

**Table S3.** Indirectness for all studies

**Table S4.** Confidence in Network Meta-analysis (CINeMA) final report

**Table S5.** Sensitivity analyses

**S1.** Search strategy

**S2.** Additional methodological information

**S3.** Pairwise meta-analyses

**S4.** Results on the comparative treatment effectiveness

**S5.** References of the included studies and details of institutional review board approval

Figure S1. PRISMA flow chart

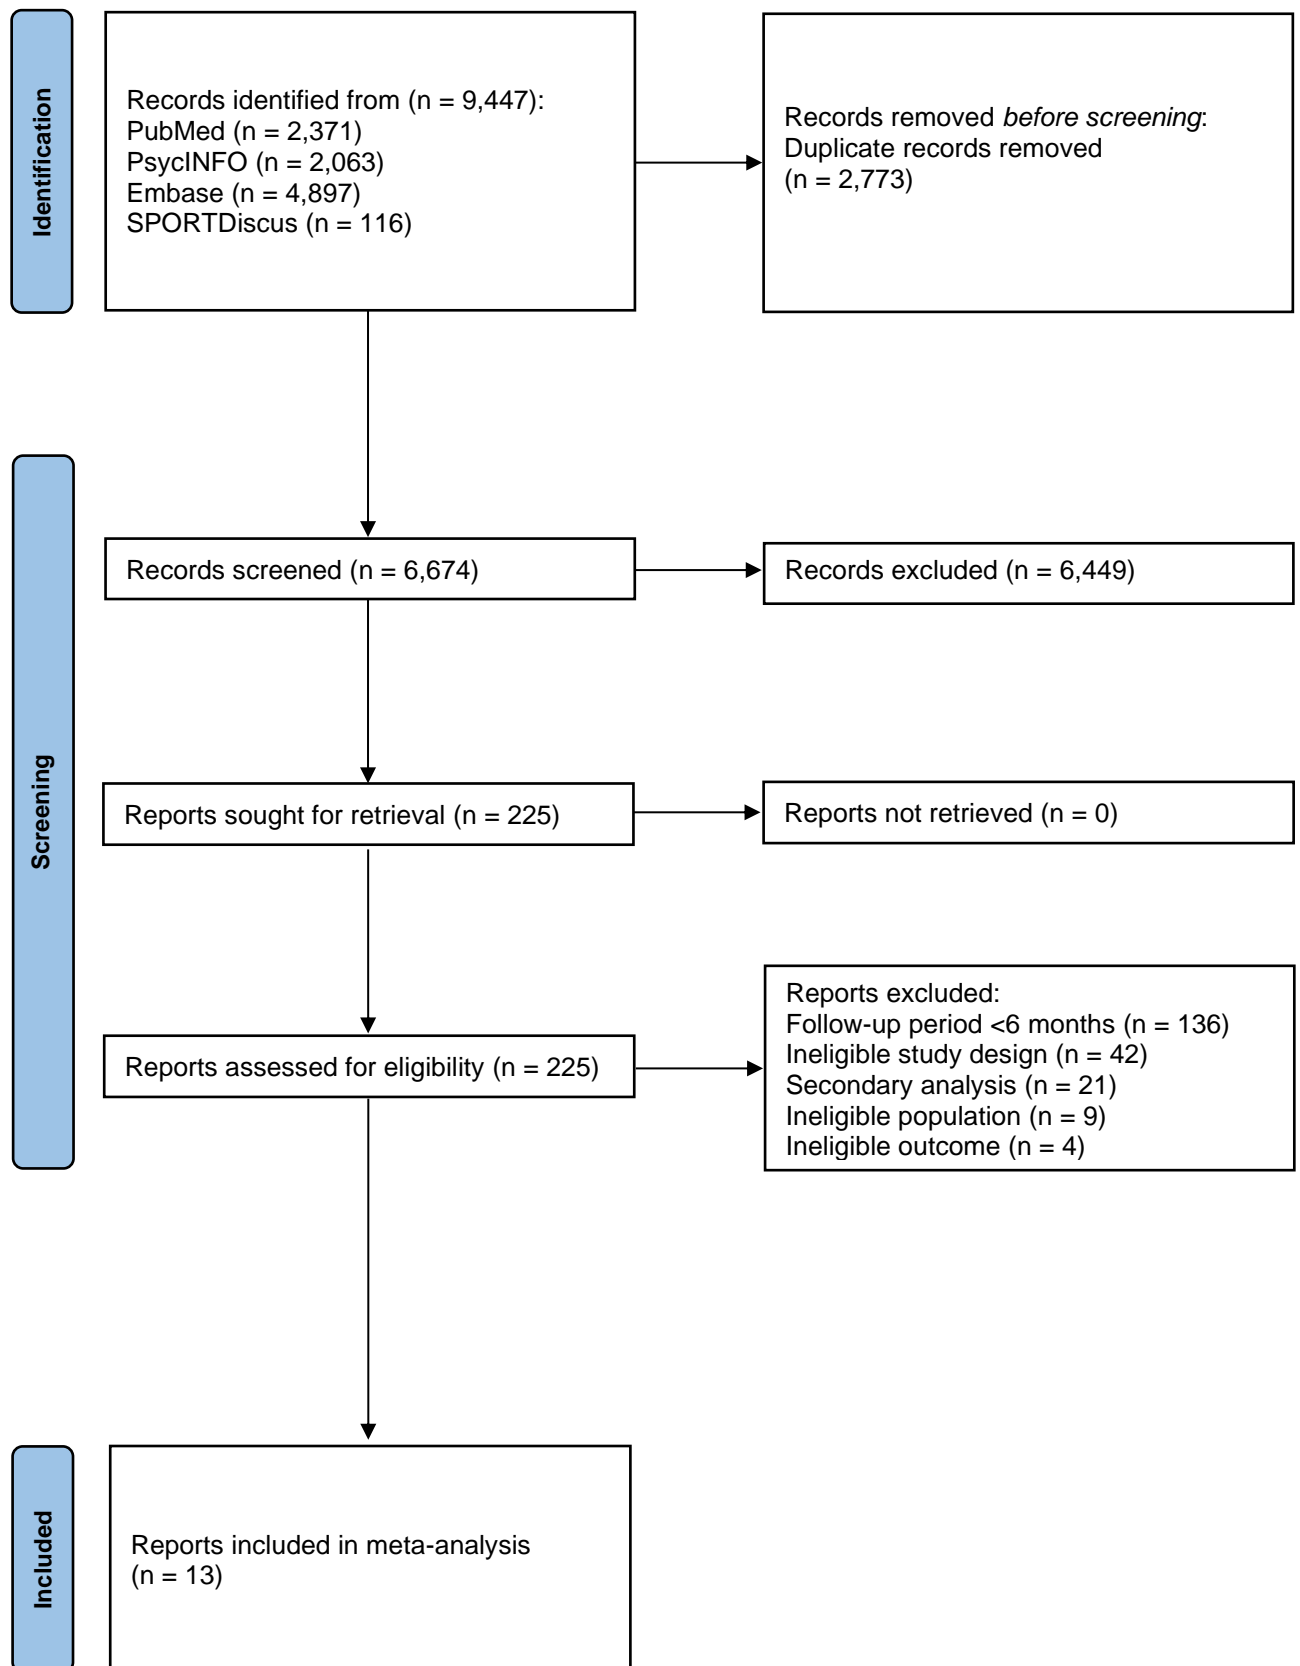

**Figure S2.** Risk of bias contributions

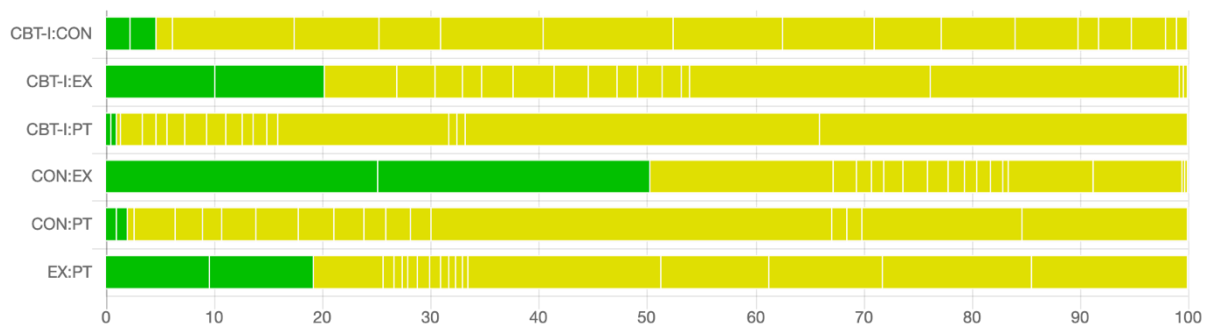

EX: exercise, CBT-I: cognitive-behavioral therapy for insomnia, PT: pharmacotherapy, CON: control.

**Figure S3.** Indirectness contributions

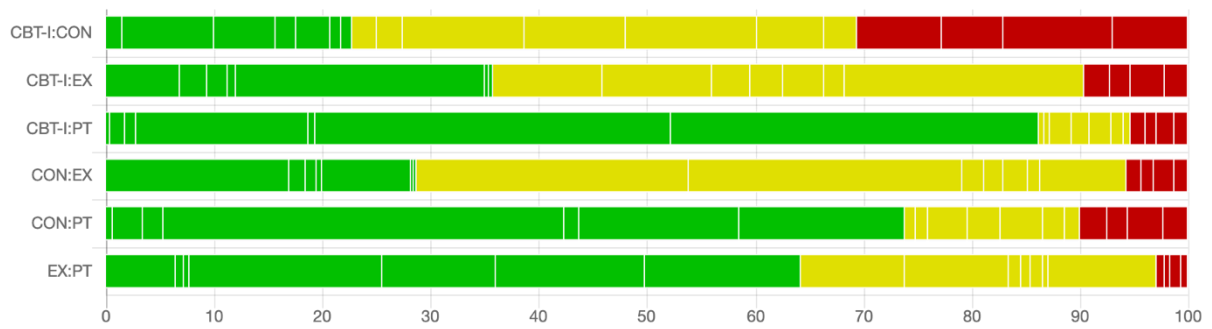

EX: exercise, CBT-I: cognitive-behavioral therapy for insomnia, PT: pharmacotherapy, CON: control.

**Table S1a. Characteristics of the interventions in the included studies (two-arm)**

| <b>Study</b>    | <b>Intervention 1</b> | <b>Major component of intervention 1</b>                                                                       | <b>Intervention 2</b> | <b>Major component of intervention 2</b>                                   | <b>Intervention duration</b> | <b>Intervention frequency</b> |
|-----------------|-----------------------|----------------------------------------------------------------------------------------------------------------|-----------------------|----------------------------------------------------------------------------|------------------------------|-------------------------------|
| Alessi, 2016    | CBT-I                 | sleep restriction, stimulus control<br>cognitive therapy, sleep hygiene<br>relapse prevention                  | Sleep education*      | sleep hygiene                                                              | 6 weeks                      | 5 sessions over 6 weeks       |
| Clarke, 2015    | CBT-I                 | sleep restriction, stimulus control<br>cognitive therapy, psychoeducation<br>sleep hygiene, relapse prevention | Relaxation training*  | psychoeducation, muscle relaxation<br>rapid relaxation, relapse prevention | 8 weeks                      | Biweekly                      |
| Edinger, 2005   | CBT-I                 | sleep restriction, stimulus control<br>cognitive therapy                                                       | Sleep hygiene*        | sleep hygiene                                                              | 6 weeks                      | Once a week                   |
| Espie, 2007     | CBT-I                 | sleep restriction, stimulus control<br>cognitive therapy, relaxation<br>sleep hygiene                          | Usual care*           | treatment as usual                                                         | 5 weeks                      | Once a week                   |
| Espie, 2008     | CBT-I                 | sleep restriction, stimulus control<br>cognitive therapy, relaxation<br>sleep hygiene                          | Usual care*           | treatment as usual                                                         | 5 weeks                      | Once a week                   |
| Edinger, 2009   | CBT-I                 | stimulus control, sleep restriction<br>cognitive therapy, sleep hygiene                                        | Sleep hygiene*        | sleep hygiene                                                              | 8 weeks                      | Biweekly                      |
| Järnfeldt, 2020 | CBT-I                 | sleep restriction, stimulus control<br>cognitive therapy, relaxation<br>sleep hygiene                          | Sleep hygiene*        | sleep hygiene                                                              | 10 weeks                     | 6 sessions over 10 weeks      |

|                   |       |                                                                                                      |                   |                                                                  |          |                            |
|-------------------|-------|------------------------------------------------------------------------------------------------------|-------------------|------------------------------------------------------------------|----------|----------------------------|
| Martínez,<br>2014 | CBT-I | sleep restriction, stimulus control<br>cognitive therapy, psychoeducation<br>relapse prevention      | Sleep<br>hygiene* | sleep hygiene                                                    | 6 weeks  | Once a week                |
| Irwin,<br>2017    | CBT-I | sleep restriction, stimulus control<br>cognitive therapy, relaxation<br>sleep hygiene, consolidation | Tai Chi           | tai chi exercise                                                 | 12 weeks | Once a week                |
| Morin,<br>1999    | CBT-I | sleep restriction, stimulus control<br>cognitive therapy, psychoeducation                            | Temazepam         | temazepam pills 7.5-30 mg<br>2-3 nights, up to 7 nights per week | 8 weeks  | Once a week<br>(for CBT-I) |

\*served as the control intervention

**Table S1b. Characteristics of the interventions in the included studies (three-arm)**

| Study       | Intervention 1 | Major component of intervention 1                                                                   | Intervention 2        | Major component of intervention 2                 | Intervention 3 | Major component of intervention 3 | Intervention duration | Intervention frequency      |
|-------------|----------------|-----------------------------------------------------------------------------------------------------|-----------------------|---------------------------------------------------|----------------|-----------------------------------|-----------------------|-----------------------------|
| Irwin, 2014 | CBT-I          | stimulus control<br>cognitive therapy<br>psychoeducation<br>mood enhancement<br>skill consolidation | Tai chi               | tai chi exercise                                  | Sleep Seminar* | sleep hygiene                     | 16 weeks              | Once a week                 |
| Siu, 2021   | Tai chi        | tai chi exercise                                                                                    | Conventional exercise | aerobic exercise<br>muscle-strengthening exercise | Usual care*    | usual care                        | 12 weeks              | Thrice a week               |
| Wu, 2006    | CBT-I          | sleep restriction<br>stimulus control<br>cognitive therapy<br>sleep hygiene                         | Temazepam             | temazepam pills<br>7.5-30 mg<br>nightly use       | Placebo*       | placebo pills<br>one tablet/night | 8 weeks               | Twice a week<br>(for CBT-I) |

\*served as the control intervention

**Table S2.** Risk of bias of the included studies

| <b>Study</b>           | <b>Randomization process</b> | <b>Deviations from the intended interventions</b> | <b>Missing outcome data</b> | <b>Measurement of the outcome</b> | <b>Selection of the reported results</b> | <b>Risk of bias</b> |
|------------------------|------------------------------|---------------------------------------------------|-----------------------------|-----------------------------------|------------------------------------------|---------------------|
| Alessi et al., 2016    | Low                          | Low                                               | Low                         | Some concerns                     | Low                                      | Some concerns       |
| Clarke et al., 2015    | Low                          | Low                                               | Low                         | Some concerns                     | Low                                      | Some concerns       |
| Edinger et al., 2005   | Low                          | Low                                               | Low                         | Some concerns                     | Low                                      | Some concerns       |
| Espie et al., 2007     | Low                          | Low                                               | Low                         | Some concerns                     | Low                                      | Some concerns       |
| Espie et al., 2008     | Low                          | Low                                               | Low                         | Some concerns                     | Low                                      | Some concerns       |
| Edinger et al., 2009   | Low                          | Low                                               | Low                         | Some concerns                     | Low                                      | Some concerns       |
| Irwin et al., 2014     | Low                          | Low                                               | Low                         | Some concerns                     | Low                                      | Some concerns       |
| Irwin et al., 2017     | Low                          | Low                                               | Low                         | Some concerns                     | Low                                      | Some concerns       |
| Järnefelt et al., 2020 | Some concerns                | Low                                               | Low                         | Some concerns                     | Low                                      | Some concerns       |
| Morin et al., 1999     | Low                          | Low                                               | Low                         | Some concerns                     | Low                                      | Some concerns       |
| Martínez et al., 2014  | Low                          | Low                                               | Low                         | Some concerns                     | Low                                      | Some concerns       |
| Siu et al., 2021       | Low                          | Low                                               | Low                         | Low                               | Low                                      | Low                 |
| Wu et al. 2006         | Some concerns                | Low                                               | Low                         | Some concerns                     | Low                                      | Some concerns       |



**Table S3.** Indirectness of the included studies

| Author                 | Population |                      | Intervention | Outcome  |                             | Comparisons | Indirectness |
|------------------------|------------|----------------------|--------------|----------|-----------------------------|-------------|--------------|
| Alessi et al., 2016    | Low        |                      | Low          | Moderate | Self-reported questionnaire | High        | Moderate     |
| Clarke et al., 2015    | High       | Depression patient   | Low          | Moderate | Self-reported questionnaire | High        | High         |
| Edinger et al., 2005   | High       | Fibromyalgia patient | Low          | Moderate | Self-reported questionnaire | High        | High         |
| Espie et al., 2007     | Low        |                      | Low          | Moderate | Self-reported questionnaire | High        | Moderate     |
| Espie et al., 2008     | High       | Cancer survivor      | Low          | Moderate | Self-reported questionnaire | High        | High         |
| Edinger et al., 2009   | Low        |                      | Low          | Moderate | Self-reported questionnaire | High        | Moderate     |
| Irwin et al., 2014     | Low        |                      | Low          | Moderate | Self-reported questionnaire | Low         | Low          |
| Irwin et al., 2017     | High       | Cancer survivor      | Low          | Moderate | Self-reported questionnaire | Low         | Moderate     |
| Järnefelt et al., 2020 | Low        |                      | Low          | Moderate | Self-reported questionnaire | High        | Moderate     |
| Morin et al., 1999     | Low        |                      | Low          | Moderate | Self-reported questionnaire | Low         | Low          |
| Martínez et al., 2014  | High       | Fibromyalgia patient | Low          | Moderate | Self-reported questionnaire | High        | High         |
| Siu et al., 2021       | Low        |                      | Low          | Moderate | Self-reported questionnaire | High        | Moderate     |
| Wu et al. 2006         | Low        |                      | Low          | Moderate | Self-reported questionnaire | Low         | Low          |

**Table S4.** Confidence in Network Meta-analysis (CINeMA) final report

| Comparison    | N  | Within-study bias | Reporting bias | Indirectness  | Imprecision   | Heterogeneity | Incoherence | Confidence rating |
|---------------|----|-------------------|----------------|---------------|---------------|---------------|-------------|-------------------|
| EX vs. CON    | 3  | Some concerns     | Low risk       | No concerns   | No concerns   | Some concerns | No concerns | High              |
| CBT-I vs. CON | 10 | Some concerns     | Low risk       | Some concerns | No concerns   | Some concerns | No concerns | High              |
| PT vs. CON    | 1  | Some concerns     | Low risk       | Some concerns | Some concerns | Some concerns | No concerns | High              |
| EX vs. CBT-I  | 2  | No concerns       | Low risk       | Some concerns | No concerns   | Some concerns | No concerns | High              |
| EX vs. PT     | 0  | Some concerns     | Low risk       | Some concerns | Some concerns | No concerns   | No concerns | High              |
| CBT-I vs. PT  | 2  | Some concerns     | Low risk       | No concerns   | Some concerns | Some concerns | No concerns | High              |

N: number of pairwise comparison, EX: exercise, CBT-I: cognitive-behavioral therapy for insomnia, PT: pharmacotherapy, CON: control.

**Table S5.** Sensitivity analyses

| Analysis               | N  | EX vs. CON                 | CBT-I vs. CON              | PT vs. CON         | EX vs. CBT-I      | EX vs. PT           | CBT-I vs. PT                | I <sup>2</sup> |
|------------------------|----|----------------------------|----------------------------|--------------------|-------------------|---------------------|-----------------------------|----------------|
| Main network           | 18 | <b>-.29</b> (-.57 to -.01) | <b>-.48</b> (-.68 to -.28) | .19 (-.32 to .69)  | .19 (-.11 to .49) | -.48 (-1.03 to .08) | <b>-.66</b> (-1.15 to -.18) | 55.6%          |
| Sensitivity analysis 1 | 11 | <b>-.32</b> (-.51 to -.13) | <b>-.48</b> (-.71 to -.24) | .40 (-.36 to 1.17) | .16 (-.08 to .40) | -.72 (-1.48 to .04) | <b>-.88</b> (-1.60 to -.16) | 20.6%          |
| Sensitivity analysis 2 | 14 | <b>-.29</b> (-.55 to -.02) | <b>-.46</b> (-.68 to -.23) | .20 (-.29 to .69)  | .17 (-.12 to .46) | -.49 (-1.02 to .05) | <b>-.66</b> (-1.13 to -.18) | 52.3%          |
| Sensitivity analysis 3 | 34 | <b>-.24</b> (-.39 to -.09) | <b>-.43</b> (-.57 to -.30) | .21 (-.26 to .68)  | .19 (-.02 to .36) | -.46 (-.94 to .03)  | <b>-.65</b> (-1.11 to -.18) | 52.9%          |

N: number of pairwise comparison, EX: exercise, CBT-I: cognitive-behavioral therapy for insomnia, PT: pharmacotherapy, CON: control.

Sensitivity 1: 11 pairwise comparisons with follow-up period  $\geq 12$  months were included,

Sensitivity 2: 4 pairwise comparisons with high indirectness were excluded,

Sensitivity 3: all the data generated by every scale (except one sleep diary data that was classified as an outlier and was excluded from the data analysis) in the included studies were synthesized and analyzed.

## S1. Search strategy

### PubMed

| Search | Query                                                                                                                                                                                                                                                                                                                                                                                                                                                      |
|--------|------------------------------------------------------------------------------------------------------------------------------------------------------------------------------------------------------------------------------------------------------------------------------------------------------------------------------------------------------------------------------------------------------------------------------------------------------------|
| #1     | Suvorexant[Title/Abstract]                                                                                                                                                                                                                                                                                                                                                                                                                                 |
| #2     | Eszopiclone[Title/Abstract]                                                                                                                                                                                                                                                                                                                                                                                                                                |
| #3     | Zaleplon[Title/Abstract]                                                                                                                                                                                                                                                                                                                                                                                                                                   |
| #4     | Zolpidem[Title/Abstract]                                                                                                                                                                                                                                                                                                                                                                                                                                   |
| #5     | Triazolam[Title/Abstract]                                                                                                                                                                                                                                                                                                                                                                                                                                  |
| #6     | Temazepam [Title/Abstract]                                                                                                                                                                                                                                                                                                                                                                                                                                 |
| #7     | Ramelteon[Title/Abstract]                                                                                                                                                                                                                                                                                                                                                                                                                                  |
| #8     | Doxepin[Title/Abstract]                                                                                                                                                                                                                                                                                                                                                                                                                                    |
| #9     | Hypnotic*[Title/Abstract] OR Soporific*[Title/Abstract] OR "Sleep* medication*" [Title/Abstract]                                                                                                                                                                                                                                                                                                                                                           |
| #10    | Exercise[MeSH Terms] OR exercise[Title/Abstract] OR "physical activity"[Title/Abstract] OR aerobic[Title/Abstract] OR running[Title/Abstract] OR walk*[Title/Abstract] OR jogging[Title/Abstract] OR swim*[Title/Abstract] OR cycl*[Title/Abstract] OR taichi [Title/Abstract] OR tai chi [Title/Abstract] OR yoga [Title/Abstract] OR qigong [Title/Abstract] OR qi gong*[Title/Abstract] OR "mind-body" [Title/Abstract] OR "mind body" [Title/Abstract] |
| #11    | Psychotherapy[Title/Abstract] OR "behavior* therapy" [Title/Abstract] OR cognitive therapy" OR "behaviour* therapy" [Title/Abstract]                                                                                                                                                                                                                                                                                                                       |
| #12    | #1 OR #2 OR #3 OR #4 OR #5 OR #6 OR #7 OR #8 OR #9                                                                                                                                                                                                                                                                                                                                                                                                         |
| #13    | Insomnia[MeSH Terms] OR insomnia*[Title/Abstract] OR "Sleep* disturbance*" [Title/Abstract] OR "Sleep* disorder*" [Title/Abstract] OR Sleep* [Title/Abstract]                                                                                                                                                                                                                                                                                              |
| #14    | Randomized controlled trial[MeSH Terms] OR Random allocation[MeSH Terms] OR (random*[Title/Abstract] AND (control*[Title/Abstract] OR placebo[Title/Abstract]))                                                                                                                                                                                                                                                                                            |
| #15    | Adults[MeSH Terms] OR adult*[Title/Abstract]                                                                                                                                                                                                                                                                                                                                                                                                               |
| #16    | #12 OR #10 OR #11                                                                                                                                                                                                                                                                                                                                                                                                                                          |
| #17    | #16 AND #13 AND #14 AND #15                                                                                                                                                                                                                                                                                                                                                                                                                                |
| #18    | Filters: from 1990 - 3000/12/12                                                                                                                                                                                                                                                                                                                                                                                                                            |

## PsycINFO

| Search | Query                                                                                                                                                                                                                                                                                                                                                                                                                                                                             |
|--------|-----------------------------------------------------------------------------------------------------------------------------------------------------------------------------------------------------------------------------------------------------------------------------------------------------------------------------------------------------------------------------------------------------------------------------------------------------------------------------------|
| #1     | SU(suvorexant) OR AB(suvorexant) OR TI(suvorexant)                                                                                                                                                                                                                                                                                                                                                                                                                                |
| #2     | SU(eszopiclone) OR AB(eszopiclone) OR TI(eszopiclone)                                                                                                                                                                                                                                                                                                                                                                                                                             |
| #3     | SU(zaleplon) OR AB(zaleplon) OR TI(zaleplon)                                                                                                                                                                                                                                                                                                                                                                                                                                      |
| #4     | SU(zolpidem) OR AB(zolpidem) OR TI(zolpidem)                                                                                                                                                                                                                                                                                                                                                                                                                                      |
| #5     | SU(triazolam) OR AB(triazolam) OR TI(triazolam)                                                                                                                                                                                                                                                                                                                                                                                                                                   |
| #6     | SU(temazepam) OR AB(temazepam) OR TI(temazepam)                                                                                                                                                                                                                                                                                                                                                                                                                                   |
| #7     | SU(ramelteon) OR AB(ramelteon) OR TI(ramelteon)                                                                                                                                                                                                                                                                                                                                                                                                                                   |
| #8     | SU(doxepin) OR AB(doxepin) OR TI(doxepin)                                                                                                                                                                                                                                                                                                                                                                                                                                         |
| #9     | SU(hypnotic*) OR AB(hypnotic*) OR TI(hypnotic*)                                                                                                                                                                                                                                                                                                                                                                                                                                   |
| #10    | SU(soporific*) OR AB(soporific*) OR TI(soporific*)                                                                                                                                                                                                                                                                                                                                                                                                                                |
| #11    | SU(sleep* medication*) OR AB(sleep* medication*) OR TI(sleep* medication*)                                                                                                                                                                                                                                                                                                                                                                                                        |
| #12    | SU(exercise) OR TI(exercise) OR AB(exercise) OR SU(physical activity) OR TI(physical activity) OR AB(physical activity) OR TI(aerobic) OR AB(aerobic) OR TI(running) OR AB(running) OR TI(walk*) OR AB(walk*) OR TI(jogging) OR AB(jogging) OR TI(swim*) OR AB(swim*) OR TI(cycl*) OR AB(cycl*) OR TI(taichi) OR AB(taichi) OR TI(yoga) OR AB(yoga) OR TI(qigong) OR AB(qigong) OR TI(qi gong) OR AB(qi gong) OR TI(mind-body) OR AB(mind-body) OR TI(mind body) OR AB(mind body) |
| #13    | TI(psychotherapy*) OR AB(psychotherapy*) OR TI(behavior* therapy) OR AB(behavior* therapy) OR TI(behaviour* therapy) OR AB(behaviour* therapy) OR TI(cognitive therapy) OR AB(cognitive therapy)                                                                                                                                                                                                                                                                                  |
| #14    | S1 OR S2 OR S3 OR S4 OR S5 OR S6 OR S7 OR S8 OR S9 OR S10 OR S11                                                                                                                                                                                                                                                                                                                                                                                                                  |
| #15    | S12 OR S13 OR S14                                                                                                                                                                                                                                                                                                                                                                                                                                                                 |
| #16    | SU(insomnia) OR SU(chronic insomnia) OR TI(insomnia*) OR AB(insomnia*) OR TI(sleep* disturbance*) OR AB(sleep* disturbance*) OR TI(sleep* disorder*) OR AB(sleep* disorder*) OR TI(sleep*) OR AB(sleep*)                                                                                                                                                                                                                                                                          |
| #17    | SU(randomized controlled trial) OR SU(randomized clinical trial) OR SU(random allocation) OR (random* AND control*) OR (random* AND placebo)                                                                                                                                                                                                                                                                                                                                      |
| #18    | S15 AND S16 AND S17                                                                                                                                                                                                                                                                                                                                                                                                                                                               |
| #19    | SU(adult*) OR TI(adult*) OR AB(adult*)                                                                                                                                                                                                                                                                                                                                                                                                                                            |
| #20    | S18 AND S19                                                                                                                                                                                                                                                                                                                                                                                                                                                                       |
| #21    | #20 Limit date range 1990-2022                                                                                                                                                                                                                                                                                                                                                                                                                                                    |

## Embase

| Search | Query                                                                                                                                                                                                                                                                                                                     |
|--------|---------------------------------------------------------------------------------------------------------------------------------------------------------------------------------------------------------------------------------------------------------------------------------------------------------------------------|
| #1     | exp suvorexant/ or suvorexant.tn,ab,ti.                                                                                                                                                                                                                                                                                   |
| #2     | exp eszopiclone/ or eszopiclone.tn,ab,ti.                                                                                                                                                                                                                                                                                 |
| #3     | exp zaleplon/ or zaleplon.tn,ab,ti.                                                                                                                                                                                                                                                                                       |
| #4     | exp zolpidem/ or zolpidem.tn,ab,ti.                                                                                                                                                                                                                                                                                       |
| #5     | exp triazolam/ or triazolam.tn,ab,ti.                                                                                                                                                                                                                                                                                     |
| #6     | exp temazepam/ or temazepam.tn,ab,ti.                                                                                                                                                                                                                                                                                     |
| #7     | exp ramelteon/ or ramelteon.tn,ab,ti.                                                                                                                                                                                                                                                                                     |
| #8     | exp doxepin/ or doxepin.tn,ab,ti.                                                                                                                                                                                                                                                                                         |
| #9     | exp hypnotic agent/ or hypnotic*.ti,ab.                                                                                                                                                                                                                                                                                   |
| #10    | exp soporific/ or soporific*.ti,ab.                                                                                                                                                                                                                                                                                       |
| #11    | 1 or 2 or 3 or 4 or 5 or 6 or 7 or 8 or 9 or 10                                                                                                                                                                                                                                                                           |
| #12    | exp exercise/ or exercise.ti,ab. or exp physical activity/ or physical activity.ti,ab. or aerobic.ti,ab. or running.ti,ab. or walk*.ti,ab. or jogging.ti,ab. or swim*.ti,ab. or cycl*.ti,ab. or taichi.ti,ab. or tai chi.ti,ab. or yoga.ti,ab. or qigong.ti,ab. or qi gong.ti,ab. or mind-body.ti,ab. or mind body.ti,ab. |
| #13    | Psychotherapy*.ti,ab. or behavior* therapy.ti,ab. or behaviour* therapy.ti,ab. or cognitive therapy.ti,ab.                                                                                                                                                                                                                |
| #14    | 11 or 12 or 13                                                                                                                                                                                                                                                                                                            |
| #15    | exp insomnia/ or exp sleep disturbance/ or exp sleep disorder/ or exp sleep                                                                                                                                                                                                                                               |
| #16    | exp randomized controlled trial/ or randomized controlled trial.ab,ti,pt. or randomized placebo trial.ti,ab. or exp randomization/                                                                                                                                                                                        |
| #17    | exp adult/ or adult*.ti,ab.                                                                                                                                                                                                                                                                                               |
| #18    | 14 and 15 and 16 and 17                                                                                                                                                                                                                                                                                                   |
| #19    | Limit 19 to yr=1990-Current                                                                                                                                                                                                                                                                                               |

**EBSCOhost SPORTDiscus**

| <b>Search</b> | <b>Query</b>                                                                                                                                                                                                                                                                                                                                                                                                                                                                                                                                                                                                                                                                                                                                                     |
|---------------|------------------------------------------------------------------------------------------------------------------------------------------------------------------------------------------------------------------------------------------------------------------------------------------------------------------------------------------------------------------------------------------------------------------------------------------------------------------------------------------------------------------------------------------------------------------------------------------------------------------------------------------------------------------------------------------------------------------------------------------------------------------|
| #1            | TI (suvorexant) OR AB (suvorexant)                                                                                                                                                                                                                                                                                                                                                                                                                                                                                                                                                                                                                                                                                                                               |
| #2            | TI (eszopiclone) OR AB (eszopiclone)                                                                                                                                                                                                                                                                                                                                                                                                                                                                                                                                                                                                                                                                                                                             |
| #3            | TI (zaleplon) OR AB (zaleplon)                                                                                                                                                                                                                                                                                                                                                                                                                                                                                                                                                                                                                                                                                                                                   |
| #4            | TI (zolpidem) OR AB (zolpidem)                                                                                                                                                                                                                                                                                                                                                                                                                                                                                                                                                                                                                                                                                                                                   |
| #5            | TI (triazolam) OR AB (triazolam)                                                                                                                                                                                                                                                                                                                                                                                                                                                                                                                                                                                                                                                                                                                                 |
| #6            | TI (temazepam) OR AB (temazepam)                                                                                                                                                                                                                                                                                                                                                                                                                                                                                                                                                                                                                                                                                                                                 |
| #7            | TI (ramelteon) OR AB (ramelteon)                                                                                                                                                                                                                                                                                                                                                                                                                                                                                                                                                                                                                                                                                                                                 |
| #8            | TI (doxepin) OR AB (doxepin)                                                                                                                                                                                                                                                                                                                                                                                                                                                                                                                                                                                                                                                                                                                                     |
| #9            | TI (hypnotic agent) OR AB (hypnotic agent)                                                                                                                                                                                                                                                                                                                                                                                                                                                                                                                                                                                                                                                                                                                       |
| #10           | TI (soporific*) OR AB (soporific*)                                                                                                                                                                                                                                                                                                                                                                                                                                                                                                                                                                                                                                                                                                                               |
| #11           | S1 or S2 or S3 or S4 or S5 or S6 or S7 or S8 or S9 or S10                                                                                                                                                                                                                                                                                                                                                                                                                                                                                                                                                                                                                                                                                                        |
| #12           | DE "EXERCISE"                                                                                                                                                                                                                                                                                                                                                                                                                                                                                                                                                                                                                                                                                                                                                    |
| #13           | DE "EXERCISE psychology"                                                                                                                                                                                                                                                                                                                                                                                                                                                                                                                                                                                                                                                                                                                                         |
| #14           | DE "EXERCISE physiology"                                                                                                                                                                                                                                                                                                                                                                                                                                                                                                                                                                                                                                                                                                                                         |
| #15           | DE "EXERCISE therapy"                                                                                                                                                                                                                                                                                                                                                                                                                                                                                                                                                                                                                                                                                                                                            |
| #16           | DE "PHYSICAL activity"                                                                                                                                                                                                                                                                                                                                                                                                                                                                                                                                                                                                                                                                                                                                           |
| #17           | DE "PHYSICAL fitness"                                                                                                                                                                                                                                                                                                                                                                                                                                                                                                                                                                                                                                                                                                                                            |
| #18           | TI (physical-activit* OR exercis* OR sport* OR fitness OR aerobic* OR walk* OR jogging OR swim* OR cycl* OR yoga OR tai chi OR taichi OR qigong OR qi gong OR mind-body OR mind body) OR AB (physical-activit* OR exercis* OR sport* OR fitness OR aerobic* OR walk* OR jogging OR swim* OR cycl* OR yoga OR tai chi OR taichi OR qigong OR qi gong OR mind-body OR mind body) OR KW (physical-activit* OR exercis* OR sport* OR fitness OR aerobic* OR walk* OR jogging OR swim* OR cycl* OR yoga OR tai chi OR taichi OR qigong OR qi gong OR mind-body OR mind body) OR SU (physical-activit* OR exercis* OR sport* OR fitness OR aerobic* OR walk* OR jogging OR swim* OR cycl* OR yoga OR tai chi OR taichi OR qigong OR qi gong OR mind-body OR mind body) |
| #19           | S12 OR S13 OR S14 OR S15 OR S16 OR S17 OR S18 OR S19                                                                                                                                                                                                                                                                                                                                                                                                                                                                                                                                                                                                                                                                                                             |
| #20           | DE (PSYCHOTHERAPY)                                                                                                                                                                                                                                                                                                                                                                                                                                                                                                                                                                                                                                                                                                                                               |
| #21           | DE (BEHAVIOR therapy)                                                                                                                                                                                                                                                                                                                                                                                                                                                                                                                                                                                                                                                                                                                                            |
| #22           | DE (BEHAVIOUR therapy)                                                                                                                                                                                                                                                                                                                                                                                                                                                                                                                                                                                                                                                                                                                                           |
| #23           | DE (COGNITIVE therapy)                                                                                                                                                                                                                                                                                                                                                                                                                                                                                                                                                                                                                                                                                                                                           |
| #24           | S21 OR S22 OR S23 OR S24                                                                                                                                                                                                                                                                                                                                                                                                                                                                                                                                                                                                                                                                                                                                         |
| #25           | DE "SLEEP disorders"                                                                                                                                                                                                                                                                                                                                                                                                                                                                                                                                                                                                                                                                                                                                             |
| #26           | TI (insomnia* OR sleep disturbance OR sleep disorder or sleep) OR AB (insomnia* OR sleep disturbance OR sleep disorder or sleep) OR KW (insomnia* OR sleep disturbance OR sleep disorder or sleep) OR SU (insomnia* OR sleep disturbance OR sleep disorder or sleep)                                                                                                                                                                                                                                                                                                                                                                                                                                                                                             |
| #27           | TI (randomi#ed)                                                                                                                                                                                                                                                                                                                                                                                                                                                                                                                                                                                                                                                                                                                                                  |
| #28           | AB (random* OR controlled)                                                                                                                                                                                                                                                                                                                                                                                                                                                                                                                                                                                                                                                                                                                                       |
| #29           | TI (trial)                                                                                                                                                                                                                                                                                                                                                                                                                                                                                                                                                                                                                                                                                                                                                       |
| #30           | AB (assigned OR allocated)                                                                                                                                                                                                                                                                                                                                                                                                                                                                                                                                                                                                                                                                                                                                       |
| #31           | DE "PLACEBOS"                                                                                                                                                                                                                                                                                                                                                                                                                                                                                                                                                                                                                                                                                                                                                    |
| #32           | TI (placebo) OR AB (placebo)                                                                                                                                                                                                                                                                                                                                                                                                                                                                                                                                                                                                                                                                                                                                     |
| #33           | S28 OR S29 OR S30 OR S31 OR S32 OR S33                                                                                                                                                                                                                                                                                                                                                                                                                                                                                                                                                                                                                                                                                                                           |
| #34           | S11 OR S20 OR 25                                                                                                                                                                                                                                                                                                                                                                                                                                                                                                                                                                                                                                                                                                                                                 |
| #35           | S26 OR S27                                                                                                                                                                                                                                                                                                                                                                                                                                                                                                                                                                                                                                                                                                                                                       |
| #36           | S34 AND S35                                                                                                                                                                                                                                                                                                                                                                                                                                                                                                                                                                                                                                                                                                                                                      |

## **S2. Additional methodological information**

### **2.1 Risk of bias**

The quality of the included studies was evaluated by the Cochrane risk of bias assessment tool (RoB-2) [74] across five domains: 1) randomization process, 2) deviations from intended interventions, 3) missing outcome data, 4) measurement of the outcome, and 5) selection of the reported results. Each domain was rated as having low risk of bias, some concerns, or high risk of bias. To implement RoB-2, we used the Excel template provided in the Cochrane Handbook for Systematic Reviews of Interventions [74], which provides signalling questions for risk of bias assessment.

1) The randomization process was assessed using three signalling questions: 1.1) was the allocation sequence random? 1.2) was the allocation sequence concealed until participants were enrolled and assigned to interventions? 1.3) did baseline differences between intervention groups suggest a problem with the randomization process?

2) The deviations from intended interventions were assessed using seven signalling questions: 2.1) were participants aware of their assigned intervention during the trial? 2.2) were carers and people delivering the interventions aware of participants' assigned intervention during the trial? 2.3) were there deviations from the intended intervention that arose because of the trial context? 2.4) were these deviations likely to have affected the outcome? 2.5) were these deviations from intended intervention balanced between groups? 2.6) was an appropriate analysis used to estimate the effect of assignment to intervention? 2.7) was there potential for a substantial impact (on the result) of the failure to analyse participants in the group to which they were randomized?

3) The missing outcome data was assessed using four signalling questions: 3.1) were data for this outcome available for all, or nearly all, participants randomized? 3.2) is there evidence that the result was not biased by missing outcome data? 3.3) could missingness in the outcome depend on its true value? 3.4) is it likely that missingness in the outcome depended on its true value?

4) The measurement of the outcome was assessed using five signalling questions: 4.1) was the method of measuring the outcome inappropriate? 4.2) could measurement or ascertainment of the outcome have differed between intervention groups? 4.3) were outcome assessors aware of the intervention received by study participants? 4.4) could assessment of the outcome have been influenced by knowledge of intervention received? 4.5) Is it likely that assessment of the outcome was influenced by knowledge of intervention received?

5) The selection of the reported results was assessed using three signalling questions: 5.1) were the data that produced this result analysed in accordance with a pre-specified analysis plan that was finalized before unblinded outcome data were available for analysis? 5.2) Is the numerical result being assessed likely to have been selected, on the basis of the results, from multiple eligible outcome measurements (e.g., scales, definitions, time points) within the outcome domain? 5.3) Is the numerical result being assessed likely to have been selected, on the basis of the results, from multiple eligible analyses of the data?

The assessments were conducted by two independent researchers. A third researcher was consulted to mediate any disagreements, which were resolved by consensus. Each domain was evaluated by the algorithm embedded in the Excel provided by the RoB-2.



## 2.2 Indirectness

Indirectness was assessed based on the Grading of Recommendations, Assessment, Development and Evaluations (GRADE) framework [75-76]. The included studies were assessed on four outcomes: 1) population, 2) intervention, 3) outcome, and 4) whether a study showed direct evidence for at least one comparison of interest.

Study indirectness was rated as “low” if  $\geq 3$  outcomes were considered to be low, “unclear” if  $\leq 1$  outcome was unclear, and “high” if  $\geq 2$  outcomes were considered to be high. Any other combination was rated as “moderate”.

## 2.3 Confidence of Network Meta-analysis (CINeMA) rating

We used the CINeMA framework to assess the confidence in the cumulative evidence [77]. The CINeMA web application of the Grading of Recommendations, Assessment, Development, and Evaluations (GRADE) covers six domains: 1) within-study bias, 2) reporting bias, 3) indirectness, 4) imprecision, 5) heterogeneity, and 6) incoherence.

1) Within-study bias was evaluated using the RoB-2 methods described in section 2.1.

2) Reporting bias was rated as “suspected” or “undetected” based on the entirety of the research and the available data.

3) Indirectness was assessed using the methods described in section 2.2.

4 to 6) Imprecision, heterogeneity, and incoherence, were assessed with the clinically significant effect size set to -0.4. The selection was based on a meta-analysis by Zweerde and colleagues [78]. Their study investigated the long-term effectiveness of CBT-I on improving sleep, which reported an effect size of -0.4 for CBT-I at  $\geq 6$  months post-intervention. There are few studies on the long-term effectiveness of pharmacotherapy and exercise on improving sleep. We believe our selection of the clinically significant effect size of -0.4 will provide a stringent evaluation on the imprecision, heterogeneity, and incoherence assessment with respect to CBT-I, as it is considered to be the first-line treatment for long-term insomnia management [79].

### References for section 2.1 to 2.3:

74. Sterne JA, Savović J, Page MJ, Elbers RG, Blencowe NS, Boutron I, Cates CJ, Cheng HY, Corbett MS, Eldridge SM, Emberson JR. RoB 2: a revised tool for assessing risk of bias in randomised trials. *Bmj*. 2019 Aug 28;366.
75. Guyatt GH, Oxman AD, Vist GE, Kunz R, Falck-Ytter Y, Alonso-Coello P, Schünemann HJ. GRADE: an emerging consensus on rating quality of evidence and strength of recommendations. *Bmj*. 2008 Apr 24;336(7650):924-6.
76. Guyatt GH, Oxman AD, Kunz R, Woodcock J, Brozek J, Helfand M, Alonso-Coello P, Falck-Ytter Y, Jaeschke R, Vist G, Akl EA. GRADE guidelines: 8. Rating the quality of evidence - indirectness. *Journal of clinical epidemiology*. 2011 Dec 1;64(12):1303-10.
77. Nikolakopoulou A, Higgins JP, Papakonstantinou T, Chaimani A, Del Giovane C, Egger M, Salanti G. CINeMA: an approach for assessing confidence in the results of a network meta-analysis. *PLoS medicine*. 2020 Apr 3;17(4):e1003082.
78. Van der Zweerde T, Bisdounis L, Kyle SD, Lancee J, van Straten A. Cognitive behavioral therapy for insomnia: a meta-analysis of long-term effects in controlled studies. *Sleep Medicine Reviews*. 2019 Dec 1;48:101208.
79. Qaseem A, Kansagara D, Forciea MA, Cooke M, Denberg TD, Clinical Guidelines Committee of the American College of Physicians\*. Management of chronic insomnia disorder in adults: a clinical practice guideline from the American College of Physicians. *Annals of internal medicine*. 2016 Jul 19;165(2):125-33.

### S3. Pairwise meta-analyses

#### 1. Comparative long-term effectiveness of the interventions on sleep

##### Comparison a: Exercise vs. Control

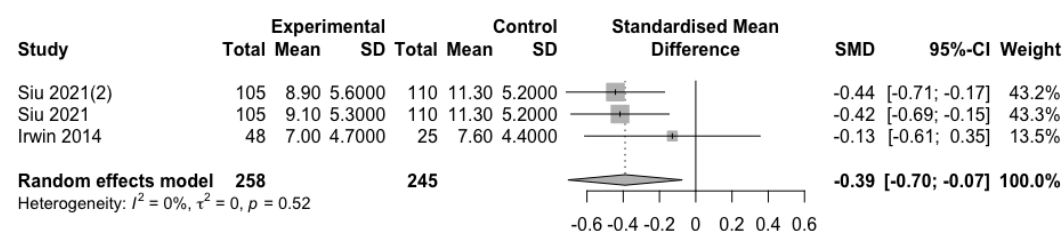

##### Comparison b: CBT-I vs. Control

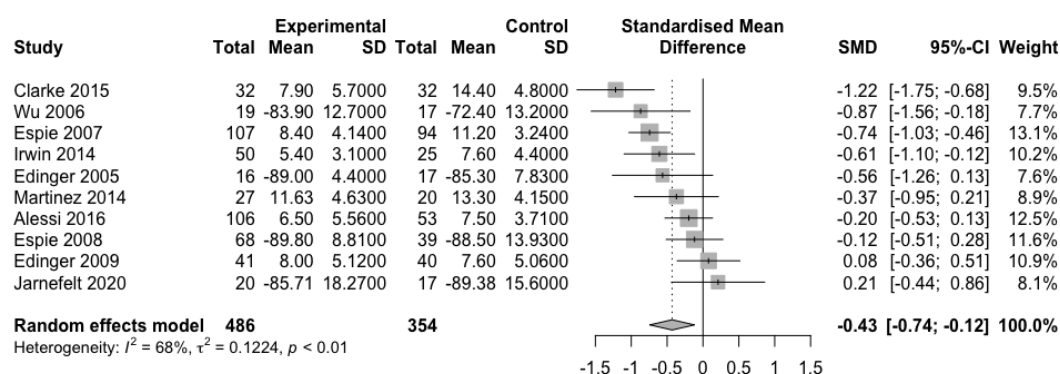

##### Comparison c: Pharmacotherapy vs. Control

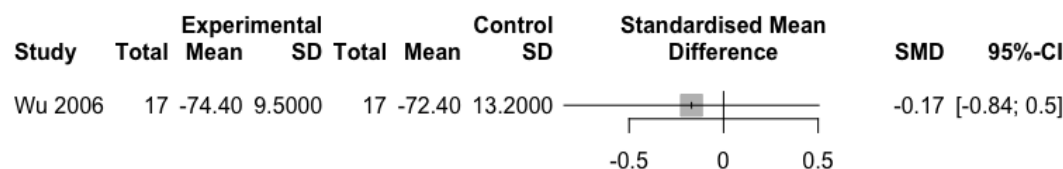

##### Comparison d: Exercise vs. CBT-I

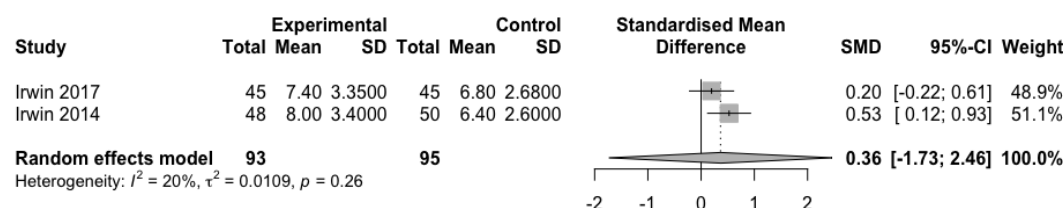

##### Comparison e: CBT-I vs. Pharmacotherapy

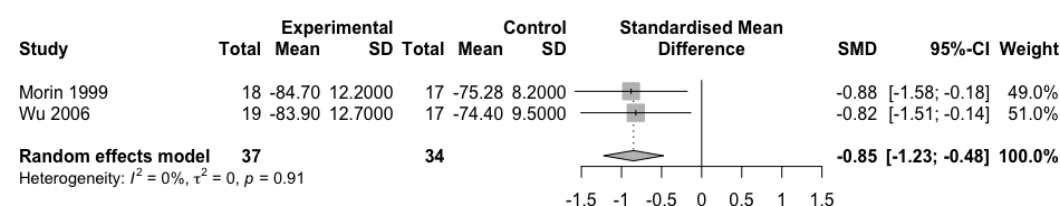

## 2. Comparative post-intervention treatment effectiveness of the interventions on sleep

### Comparison a: Exercise vs. Control

| Study                       | Experimental |       |        | Control    |       |        | Standardised Mean Difference                                                      | SMD          | 95%-CI                | Weight        |
|-----------------------------|--------------|-------|--------|------------|-------|--------|-----------------------------------------------------------------------------------|--------------|-----------------------|---------------|
|                             | Total        | Mean  | SD     | Total      | Mean  | SD     |                                                                                   |              |                       |               |
| Siu 2021                    | 105          | 9.10  | 5.1000 | 110        | 12.90 | 5.6000 |  | -0.71        | [-0.98; -0.43]        | 40.9%         |
| Irwin 2014                  | 48           | 7.60  | 3.0000 | 25         | 9.50  | 4.0000 |  | -0.56        | [-1.05; -0.07]        | 17.1%         |
| Siu 2021                    | 105          | 10.60 | 5.8000 | 110        | 12.90 | 5.6000 |  | -0.40        | [-0.67; -0.13]        | 42.0%         |
| <b>Random effects model</b> | <b>258</b>   |       |        | <b>245</b> |       |        |  | <b>-0.55</b> | <b>[-0.97; -0.13]</b> | <b>100.0%</b> |

Heterogeneity:  $I^2 = 16\%$ ,  $\tau^2 = 0.0112$ ,  $p = 0.30$

### Comparison b: CBT-I vs. Control

| Study                       | Experimental |        |         | Control    |        |         | Standardised Mean Difference                                                       | SMD          | 95%-CI                | Weight        |
|-----------------------------|--------------|--------|---------|------------|--------|---------|------------------------------------------------------------------------------------|--------------|-----------------------|---------------|
|                             | Total        | Mean   | SD      | Total      | Mean   | SD      |                                                                                    |              |                       |               |
| Irwin 2014                  | 50           | 6.10   | 3.4000  | 25         | 9.50   | 4.0000  |   | -0.93        | [-1.44; -0.43]        | 8.6%          |
| Clarke 2015                 | 32           | 9.70   | 5.1000  | 32         | 14.10  | 6.2000  |   | -0.77        | [-1.27; -0.26]        | 8.5%          |
| Espie 2008                  | 74           | -89.80 | 9.4800  | 40         | -82.00 | 11.3300 |   | -0.76        | [-1.16; -0.36]        | 12.5%         |
| Wu 2006                     | 19           | -80.50 | 13.9000 | 17         | -71.50 | 15.3000 |   | -0.60        | [-1.27; 0.07]         | 5.2%          |
| Alessi 2016                 | 106          | 5.50   | 3.7100  | 53         | 7.70   | 3.4900  |   | -0.60        | [-0.94; -0.27]        | 15.9%         |
| Martinez 2014               | 30           | 11.33  | 4.0300  | 27         | 13.48  | 2.8800  |   | -0.60        | [-1.13; -0.07]        | 7.8%          |
| Edinger 2005                | 16           | -88.00 | 6.4000  | 17         | -84.70 | 7.0100  |   | -0.48        | [-1.17; 0.21]         | 4.9%          |
| Espie 2007                  | 107          | 9.84   | 4.1700  | 94         | 11.30  | 3.6800  |   | -0.37        | [-0.65; -0.09]        | 20.1%         |
| Edinger 2009                | 41           | 7.10   | 4.4800  | 40         | 7.80   | 4.4300  |   | -0.16        | [-0.59; 0.28]         | 10.8%         |
| Jarnefelt 2020              | 20           | -86.63 | 18.1900 | 17         | -85.31 | 23.3600 |   | -0.06        | [-0.71; 0.58]         | 5.6%          |
| <b>Random effects model</b> | <b>495</b>   |        |         | <b>362</b> |        |         |  | <b>-0.53</b> | <b>[-0.72; -0.35]</b> | <b>100.0%</b> |

Heterogeneity:  $I^2 = 18\%$ ,  $\tau^2 = 0.0137$ ,  $p = 0.27$

### Comparison c: Pharmacotherapy vs. Control

| Study   | Experimental |        |        | Control |        |         | Standardised Mean Difference                                                        | SMD   | 95%-CI         |
|---------|--------------|--------|--------|---------|--------|---------|-------------------------------------------------------------------------------------|-------|----------------|
|         | Total        | Mean   | SD     | Total   | Mean   | SD      |                                                                                     |       |                |
| Wu 2006 | 17           | -85.60 | 8.3000 | 17      | -71.50 | 15.3000 |  | -1.12 | [-1.85; -0.39] |

### Comparison d: Exercise VS. CBT-I

| Study                       | Experimental |      |        | Control   |      |        | Standardised Mean Difference                                                        | SMD         | 95%-CI               | Weight        |
|-----------------------------|--------------|------|--------|-----------|------|--------|-------------------------------------------------------------------------------------|-------------|----------------------|---------------|
|                             | Total        | Mean | SD     | Total     | Mean | SD     |                                                                                     |             |                      |               |
| Irwin 2017                  | 45           | 8.20 | 2.6800 | 45        | 7.30 | 2.6800 |  | 0.33        | [-0.08; 0.75]        | 48.2%         |
| Irwin 2014                  | 48           | 7.60 | 3.0000 | 50        | 6.10 | 3.4000 |  | 0.46        | [0.06; 0.87]         | 51.8%         |
| <b>Random effects model</b> | <b>93</b>    |      |        | <b>95</b> |      |        |  | <b>0.40</b> | <b>[-0.43; 1.23]</b> | <b>100.0%</b> |

Heterogeneity:  $I^2 = 0\%$ ,  $\tau^2 = 0$ ,  $p = 0.66$

### Comparison e: CBT-I vs. Pharmacotherapy

| Study                       | Experimental |        |         | Control   |        |        | Standardised Mean Difference                                                        | SMD         | 95%-CI               | Weight        |
|-----------------------------|--------------|--------|---------|-----------|--------|--------|-------------------------------------------------------------------------------------|-------------|----------------------|---------------|
|                             | Total        | Mean   | SD      | Total     | Mean   | SD     |                                                                                     |             |                      |               |
| Morin 1999                  | 18           | -84.80 | 7.2000  | 17        | -82.68 | 6.4000 |  | -0.30       | [-0.97; 0.36]        | 49.9%         |
| Wu 2006                     | 19           | -80.50 | 13.9000 | 17        | -85.60 | 8.3000 |  | 0.43        | [-0.23; 1.09]        | 50.1%         |
| <b>Random effects model</b> | <b>37</b>    |        |         | <b>34</b> |        |        |  | <b>0.06</b> | <b>[-4.59; 4.72]</b> | <b>100.0%</b> |

Heterogeneity:  $I^2 = 57\%$ ,  $\tau^2 = 0.1537$ ,  $p = 0.13$

**S4. Results of the comparative post-intervention treatment effectiveness of the interventions from the network and pairwise meta-analyses**

|                                                                |                                                                |                                                                |                                                                          |
|----------------------------------------------------------------|----------------------------------------------------------------|----------------------------------------------------------------|--------------------------------------------------------------------------|
| <b>Exercise</b>                                                | 0.40 (-0.43 to 1.23)<br>(N=2; I <sup>2</sup> =0.0%)            | NA <sup>b</sup>                                                | <b>-0.55</b> (-0.97 to -0.13)<br>(N=2; I <sup>2</sup> =16.1%)            |
| 0.16 (-0.07 to 0.40)<br>(N=13; I <sup>2</sup> =32.4%)          | <b>CBT-I</b>                                                   | 0.06 (-4.59 to 4.72)<br>(N=2, I <sup>2</sup> =57.2%)           | <b>-0.53</b> (-0.72 to -0.35)<br>(N=10, I <sup>2</sup> =18.3%)           |
| 0.37 (-0.85 to 0.12)<br>(N=13; I <sup>2</sup> =32.4%)          | -0.20 (-0.30 to 0.70)<br>(N=13; I <sup>2</sup> =32.4%)         | <b>Temazepam</b>                                               | <b>-1.12</b> (-1.85 to -0.39)<br>(N=1; I <sup>2</sup> =NA <sup>a</sup> ) |
| <b>-0.44</b> (-0.65 to -0.22)<br>(N=13; I <sup>2</sup> =32.4%) | <b>-0.60</b> (-0.76 to -0.44)<br>(N=13; I <sup>2</sup> =32.4%) | <b>-0.80</b> (-1.25 to -0.36)<br>(N=13; I <sup>2</sup> =32.4%) | <b>Control</b>                                                           |

Results of the network meta-analyses are presented in grey boxes, and results of the pairwise meta-analyses are presented in white boxes. Estimates are displayed as column vs. row for the network meta-analyses and row vs. column for the pairwise meta-analyses. Results are expressed as SMDs. A negative SMD indicates superiority of the first treatment over the comparison treatment. Bold estimates indicate a statistical difference.

N=number of studies in the comparison

NA<sup>a</sup>=no evidence on I<sup>2</sup> was available as there was only one study for that comparison.

NA<sup>b</sup>=no studies compared exercise vs. temazepam.

## **S5. References of the included studies and details of institutional review board approval**

1. Alessi, C., Martin, J.L., Fiorentino, L., Fung, C.H., Dzierzewski, J.M., Rodriguez Tapia, J.C., Song, Y., Josephson, K., Jouldjian, S. and Mitchell, M.N., 2016. Cognitive behavioral therapy for insomnia in older veterans using nonclinician sleep coaches: randomized controlled trial. *Journal of the American Geriatrics Society*, 64(9), pp.1830-1838.

IRB Approval: The Veterans Affairs (VA) Greater Los Angeles Healthcare System.

2. Norell-Clarke, A., Jansson-Fröjmark, M., Tillfors, M., Holländare, F. and Engström, I., 2015. Group cognitive behavioural therapy for insomnia: Effects on sleep and depressive symptomatology in a sample with comorbidity. *Behaviour research and therapy*, 74, pp.80-93.

IRB Approval: The Regional Ethics Vetting Board in Uppsala, Sweden.

3. Edinger, J.D., Wohlgemuth, W.K., Krystal, A.D. and Rice, J.R., 2005. Behavioral insomnia therapy for fibromyalgia patients: a randomized clinical trial. *Archives of internal medicine*, 165(21), pp.2527-2535.

IRB Approval: Duke University Medical Centre's Institutional Review Board.

4. Espie, C.A., MacMahon, K.M., Kelly, H.L., Broomfield, N.M., Douglas, N.J., Engleman, H.M., McKinstry, B., Morin, C.M., Walker, A. and Wilson, P., 2007. Randomized clinical effectiveness trial of nurse-administered small-group cognitive behavior therapy for persistent insomnia in general practice. *Sleep*, 30(5), pp.574-584.

IRB Approval: Local NHS Research Ethics Committees.

5. Espie, C.A., Fleming, L., Cassidy, J., Samuel, L., Taylor, L.M., White, C.A., Douglas, N.J., Engleman, H.M., Kelly, H.L. and Paul, J., 2008. Randomized controlled clinical effectiveness trial of cognitive behavior therapy compared with treatment as usual for persistent insomnia in patients with cancer. *Journal of clinical oncology*, 26(28), pp.4651-4658.

IRB Approval: Local NHS Research Ethics Committees.

6. Edinger, J.D., Olsen, M.K., Stechuchak, K.M., Means, M.K., Lineberger, M.D., Kirby, A., and Carney, C.E., 2009. Cognitive behavioral therapy for patients with primary insomnia or insomnia associated predominantly with mixed psychiatric disorders: a randomized clinical trial. *Sleep*, 32(4), pp.499-510.

IRB Approval: The Institutional Review Board of the Durham (NC) VA Medical Center.

7. Irwin, M.R., Olmstead, R., Carrillo, C., Sadeghi, N., Breen, E.C., Witarama, T., Yokomizo, M., Lavretsky, H., Carroll, J.E., Motivala, S.J. and Bootzin, R., 2014. Cognitive behavioral therapy vs. Tai Chi for late life insomnia and inflammatory risk: a randomized controlled comparative efficacy trial. *Sleep*, 37(9), pp.1543-1552.

IRB Approval: UCLA Institutional Review Board.

8. Irwin, M.R., Olmstead, R., Carrillo, C., Sadeghi, N., Nicassio, P., Ganz, P.A. and Bower, J.E., 2017. Tai Chi Chih compared with cognitive behavioral therapy for the treatment of insomnia in survivors of breast cancer: a randomized, partially blinded, noninferiority trial. *Journal of Clinical Oncology*, 35(23), p.2656.

IRB Approval: UCLA Institutional Review Board.

9. Järnefelt, H., Härmä, M., Sallinen, M., Virkkala, J., Paajanen, T., Martimo, K.P. and Hublin, C., 2020. Cognitive behavioural therapy interventions for insomnia among shift workers: RCT in an occupational health setting. *International archives of occupational and environmental health*, 93(5), pp.535-550.

IRB Approval: The Coordinating Ethics Committees of the Hospital District of Helsinki and Uusimaa, Finland.

10. Morin, C.M., Colecchi, C., Stone, J., Sood, R. and Brink, D., 1999. Behavioral and pharmacological therapies for late-life insomnia: a randomized controlled trial. *Jama*, 281(11), pp.991-999.

IRB Approval: The Institutional Review Board of the Medical College of Virginia/ Virginia Commonwealth University.

11. Martínez, M.P., Miró, E., Sánchez, A.I., Díaz-Piedra, C., Cáliz, R., Vlaeyen, J.W. and Buela-Casal, G., 2014. Cognitive-behavioral therapy for insomnia and sleep hygiene in fibromyalgia: a randomized controlled trial. *Journal of behavioral medicine*, 37(4), pp.683-697.

IRB Approval: The University of Granada Ethics Committee.

12. Siu, P.M., Angus, P.Y., Tam, B.T., Chin, E.C., Doris, S.Y., Chung, K.F., Hui, S.S., Woo, J., Fong, D.Y., Lee, P.H. and Wei, G.X., 2021. Effects of tai chi or exercise on sleep in older adults with insomnia: a randomized clinical trial. *JAMA network open*, 4(2), pp.e2037199-e2037199.6  
s

IRB Approval: The Hong Kong Polytechnic University Human Subjects Ethics Office.

13. Wu, R., Bao, J., Zhang, C., Deng, J. and Long, C., 2006. Comparison of sleep condition and sleep-related psychological activity after cognitive-behavior and pharmacological therapy for chronic insomnia. *Psychotherapy and psychosomatics*, 75(4), pp.220-228.

IRB Approval: The Institutional Review Board of Peking University.
